# Supplementary material
Source: PubMed Central journal article supplement (PMC6014546)
Supplement: DC172518SupplementaryData.pdf [file DC172518SupplementaryData.pdf]

SUPPLEMENTARY DATA

**Supplementary Table 1.** Number of RCC cases diagnosed per year after diagnosis of type 2 diabetes.

| <b>Time Since Diabetes Diagnosis</b> | <b>Number of RCC Cases Diagnosed</b> |                   |
|--------------------------------------|--------------------------------------|-------------------|
|                                      | <b>Women (NHS)</b>                   | <b>Men (HPFS)</b> |
| ≤ 1 year                             | 5                                    | 1                 |
| >1 - ≤ 2 years                       | 6                                    | 0                 |
| >2 - ≤ 3 years                       | 4                                    | 2                 |
| >3 - ≤ 4 years                       | 5                                    | 0                 |
| >4 - ≤ 5 years                       | 7                                    | 3                 |
| >5 - ≤ 6 years                       | 1                                    | 1                 |
| >6 - ≤ 7 years                       | 6                                    | 1                 |
| >7 - ≤ 8 years                       | 0                                    | 3                 |
| >8 - ≤ 9 years                       | 1                                    | 0                 |
| >9 - ≤ 10 years                      | 3                                    | 1                 |
| > 10 years                           | 21                                   | 9                 |

Abbreviations: HPFS – Health Professionals Follow-up Study; NHS – Nurses’ Health Study; RCC – renal cell carcinoma.

SUPPLEMENTARY DATA

**Supplementary Table 2.** Hazard ratios (HR) and 95% confidence intervals (CI) for associations between type 2 diabetes and risk of total and fatal various RCC outcomes, NHS (1976-2014) and HPFS (1986-2014), updating covariates only until diabetes diagnosis (if any) and holding them steady thereafter.

|           | Women (NHS)                          |                               | Men (HPFS)                           |                               |
|-----------|--------------------------------------|-------------------------------|--------------------------------------|-------------------------------|
|           | # RCC Cases<br>No Diabetes /Diabetes | Multivariable*<br>HR (95% CI) | # RCC Cases<br>No Diabetes /Diabetes | Multivariable*<br>HR (95% CI) |
| RCC       | 359 / 59                             | 1.86 (1.36, 2.53)             | 281 / 21                             | 0.99 (0.63, 1.56)             |
| Fatal RCC | 108 / 12                             | 1.64 (0.83, 3.22)             | 80 / 7                               | 1.44 (0.64, 3.23)             |

Abbreviations: CI – confidence interval; HPFS – Health Professionals Follow-up Study; HR – hazard ratio; NHS – Nurses’ Health Study; RCC – renal cell carcinoma.

\* Adjusted for age, calendar time, BMI (<23, 23-<25, 25-<27, ≥27 kg/m<sup>2</sup>), history of hypertension (yes, no), smoking status (never, past, current), pack-years (continuous), physical activity (quartiles of metabolic equivalents-hours / week), duration of non-aspirin non-steroidal anti-inflammatory drug use (<5 years, ≥5 years), parity (NHS only; 0, 1-2, 3, ≥4 children), and alcohol intake (quartiles).
